# Supplementary material for: Multiple arterial coronary bypass grafting is associated with greater survival in women
Source: HighWire-hosted journal article supplement (doi:10.1136/heartjnl-2020-317737), 2020-10-20
Supplement: heartjnl-2020-317737supp001_data_supplement.pdf [file heartjnl-2020-317737supp001_data_supplement.pdf]

## Supplemental Appendix

### Variables entered into propensity score

1. Age
2. Body Mass Index
3. Hospital Frailty Risk Score
4. Income Quintile
5. Hypertension
6. Diabetes
7. History of smoking
8. CCS Class
9. NY Heart Association
10. Left ventricular function
11. History of CHF
12. History of MI
13. Recent MI
14. PVD
15. CVD
16. COPD
17. Creatinine Group
18. Dialysis
19. Urgency Status
20. Extent of coronary artery disease
21. Off Pump

**Codes for outcome ascertainment**

|                                        | <b>Database</b> | <b>Codes</b>                                                                                                                                                                                                                        |
|----------------------------------------|-----------------|-------------------------------------------------------------------------------------------------------------------------------------------------------------------------------------------------------------------------------------|
| <b>Outcomes</b>                        |                 |                                                                                                                                                                                                                                     |
| ICU length of stay                     | OHIP            | Number of days that the following OHIP codes are continuously billed following index procedure: G400, G405 OR G557 (first day); G401, G406 OR G558 (days 2-30); G402, G407 OR G559 (after 31 days).                                 |
| Hospital length of stay                | CIHI-DAD        | Number of days between index procedure and discharge date, subtracting the number of ALC days (ALC LOS). Discharge is defined as discharge/transfer to any non-hospital/non-acute care facility (DISCHDISP = 2, 3, 4, 5, 6, 7, 12). |
| Any stroke                             | CIHI-DAD        | <b>ICD-10</b> I60.x I61.x I62.x I63.x, I64.x, H34.1 (excluding I63.6)                                                                                                                                                               |
| Acute myocardial infarction            | CIHI-DAD        | <b>ICD-10</b> I21.x, I22.x                                                                                                                                                                                                          |
| Sternal complications                  | CIHI-DAD        | <b>CCI:</b> 1SK.73, 1SK74, 1SK80, 1SK87, 1SY80LAXXG                                                                                                                                                                                 |
| Coronary revascularization             | CIHI-DAD        | <b>CCI</b> 1IJ50x, 1IJ54x, 1IJ57GQ, 1IJ76x                                                                                                                                                                                          |
| - Percutaneous coronary intervention   | CIHI-DAD        | CCI codes: 1IJ50, 1IJ54, 1IJ57GQ                                                                                                                                                                                                    |
| - Coronary artery bypass graft surgery | CIHI-DAD        | CCI code 1IJ76                                                                                                                                                                                                                      |

## Supplemental Figures

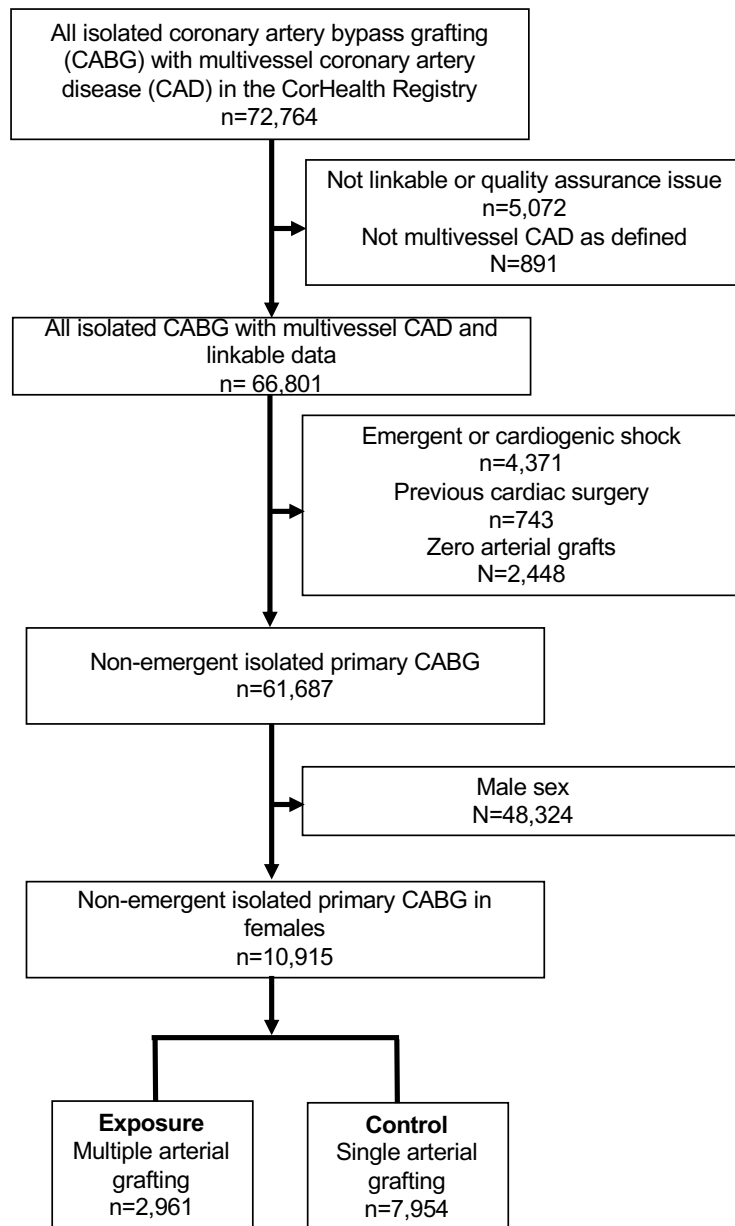

Supplemental Figure 1. Patient flow diagram for cohort derivation.

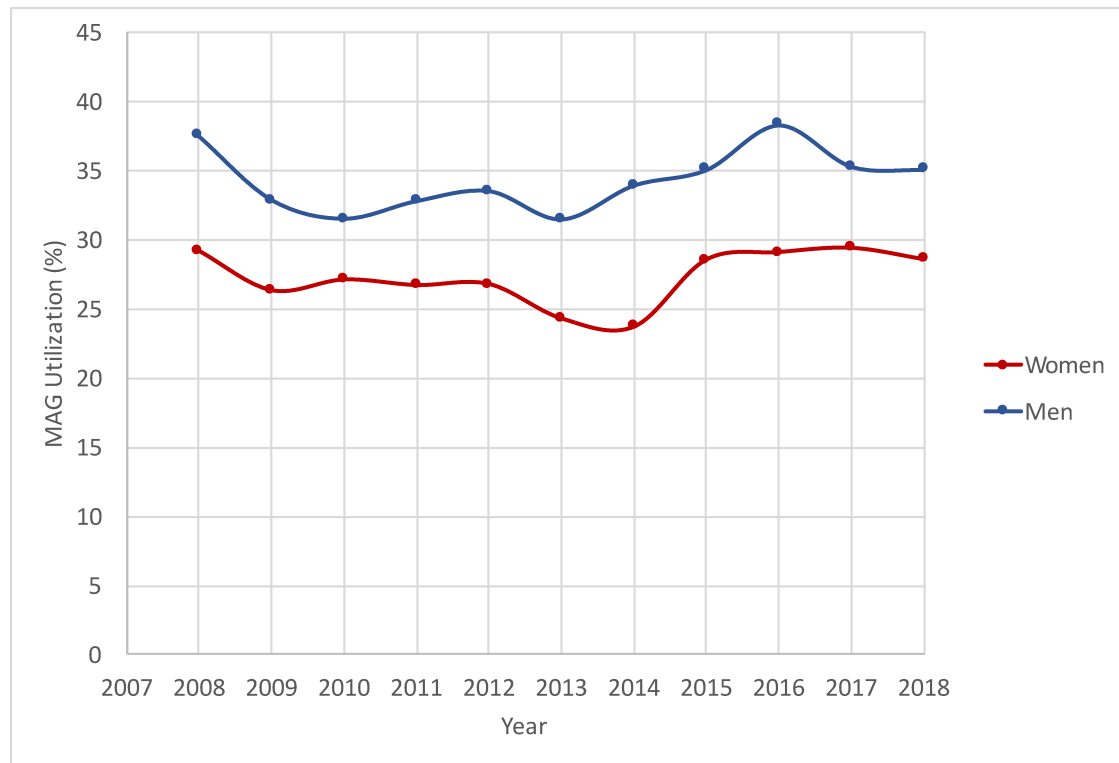

Supplemental Figure 2. Time trend for multiple arterial grafting (MAG) utilization in women (red) and men (blue) with multivessel coronary artery disease. Linear regression of MAG utilization by year of procedure was not significant in women ( $p=0.47$ ) or men ( $p=0.35$ ) although the utilization was higher in men compared to women (34% vs 28%,  $p<0.001$ ) over the entire study period.

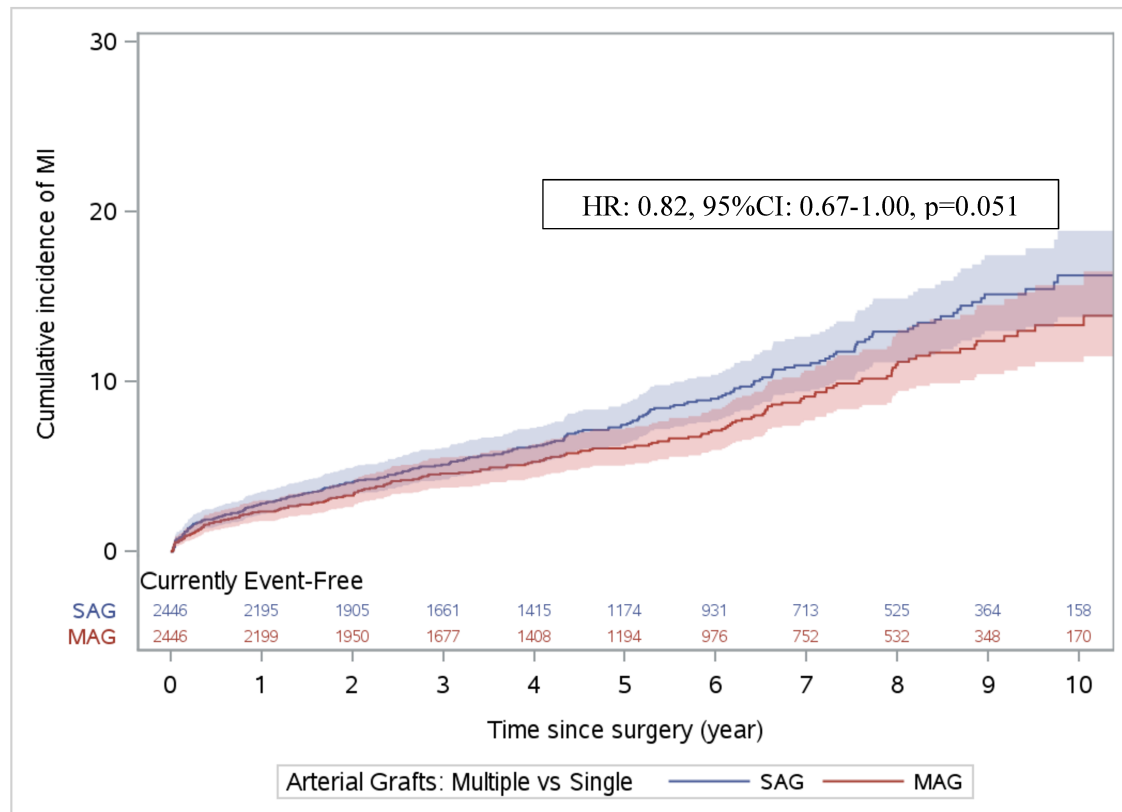

Supplemental Figure 3. Cumulative incidence curves for acute myocardial infarction was compared between multiple arterial grafting (MAG) versus single arterial grafting (SAG) after propensity score matching in patients multivessel coronary artery disease and adjusting for death as a competing risk. The shaded region around the curve represents the 95% confidence interval.

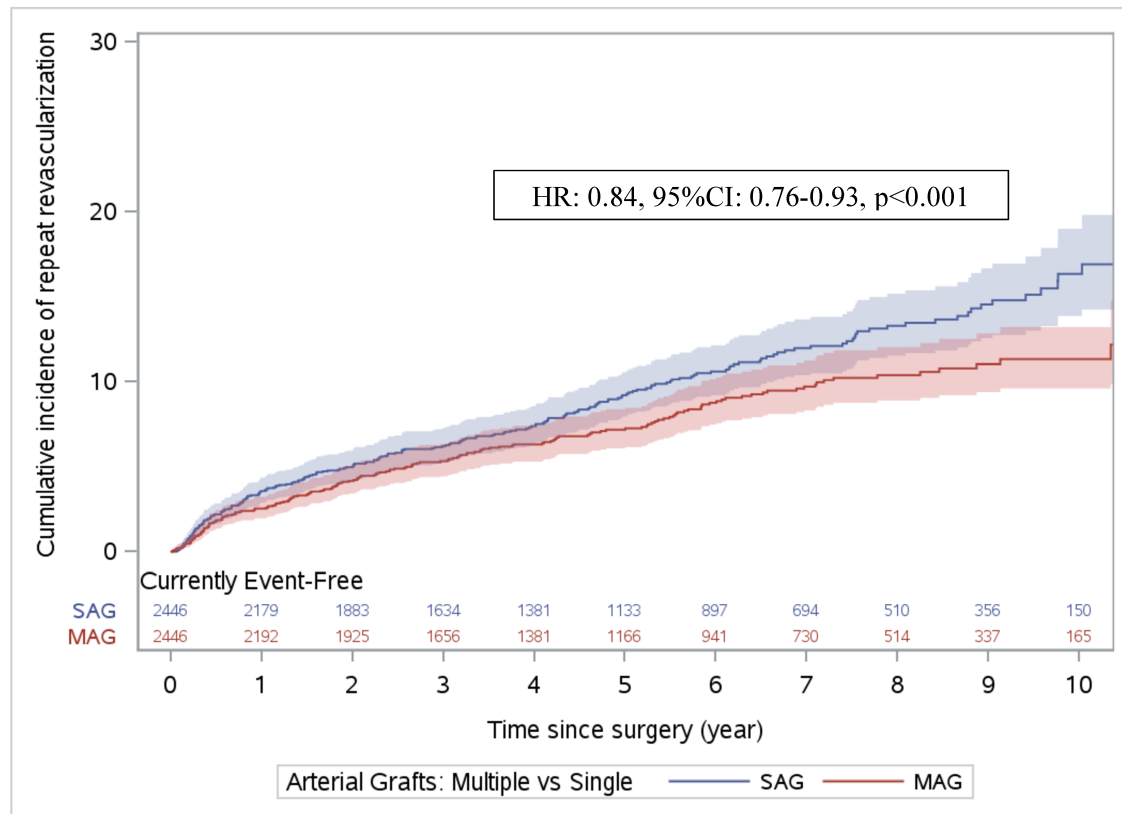

Supplemental Figure 4. Cumulative incidence curves for repeat revascularization was compared between multiple arterial grafting (MAG) versus single arterial grafting (SAG) after propensity score matching in patients multivessel coronary artery disease and adjusting for death as a competing risk. The shaded region around the curve represents the 95% confidence interval.

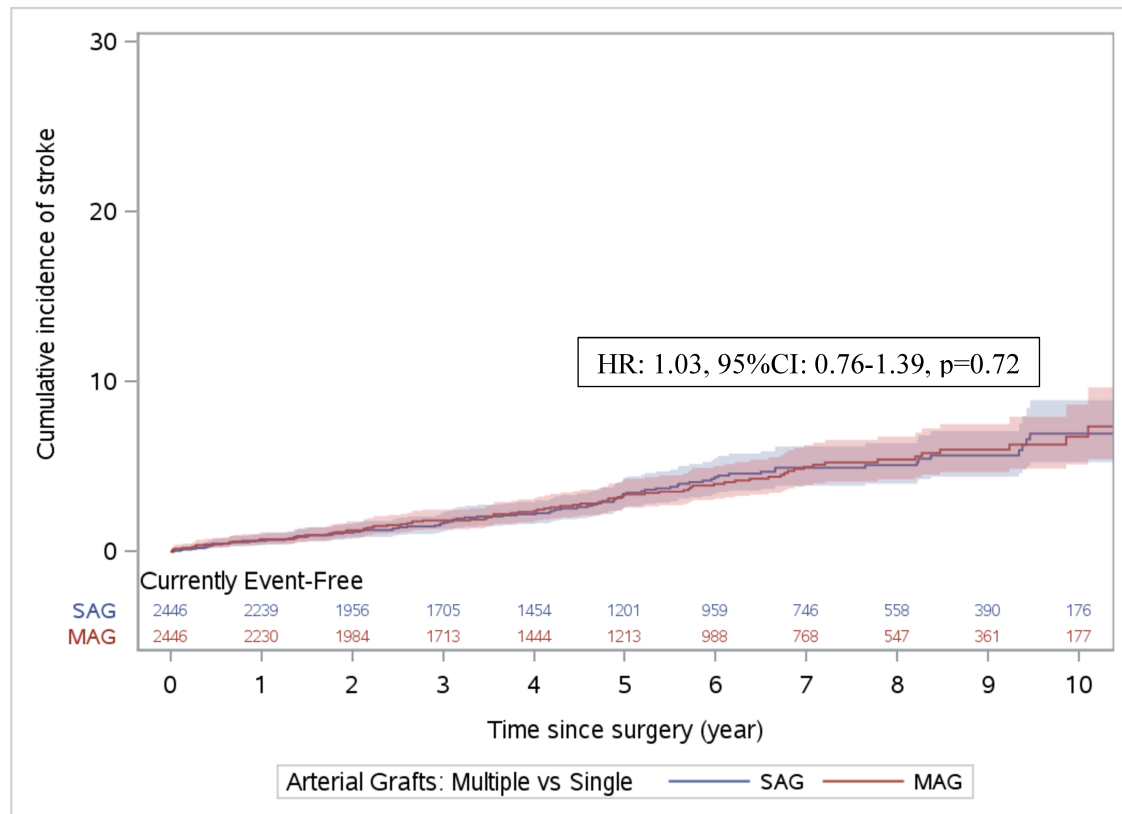

Supplemental Figure 5. Cumulative incidence curves stroke was compared between multiple arterial grafting (MAG) versus single arterial grafting (SAG) after propensity score matching in patients multivessel coronary artery disease and adjusting for death as a competing risk. The shaded region around the curve represents the 95% confidence interval.

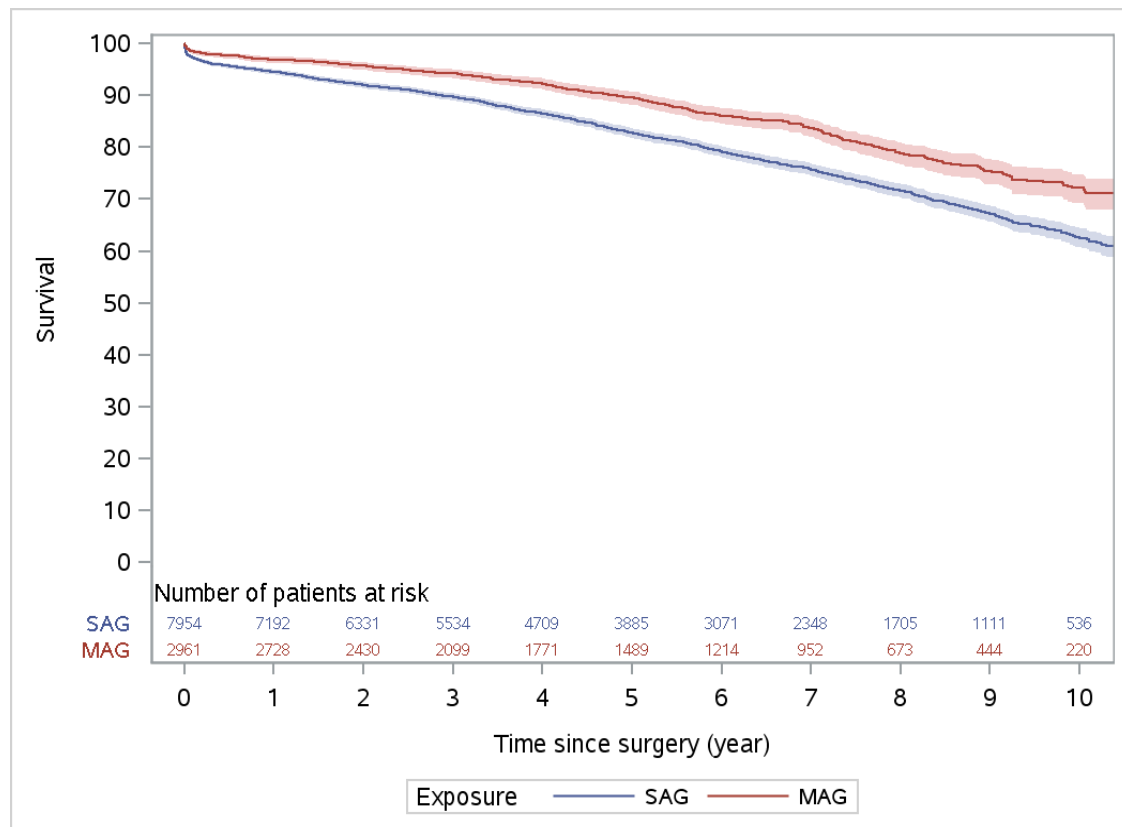

Supplemental Figure 6. Kaplan-Meier curves for survival. Survival was compared between multiple arterial grafting (MAG) versus single arterial grafting (SAG) before propensity score matching in patients multivessel coronary artery disease. The shaded region around the curve represents the 95% confidence interval.



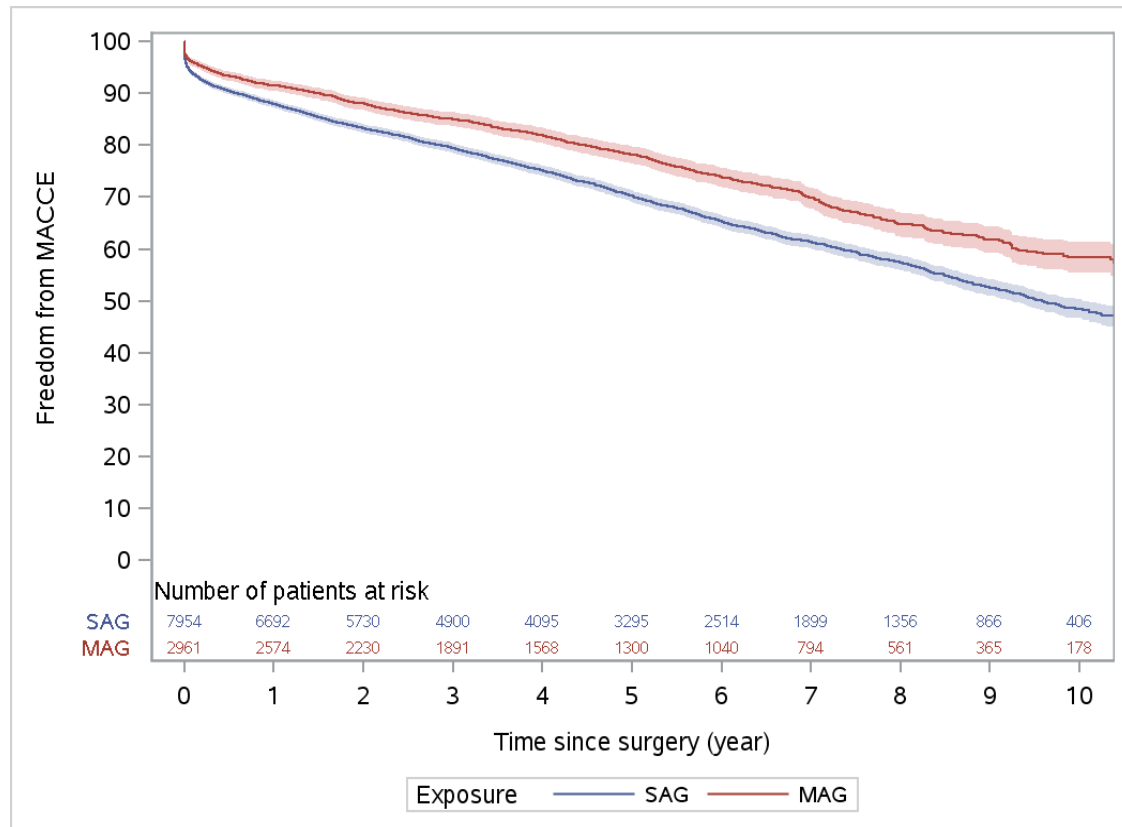

Supplemental Figure 7. Kaplan-Meier curves for freedom from major adverse cardiac and cerebrovascular events (MACCE). Freedom from MACCE was compared between multiple arterial grafting (MAG) versus single arterial grafting (SAG) before propensity score matching in patients multivessel coronary artery disease. The shaded region around the curve represents the 95% confidence interval.

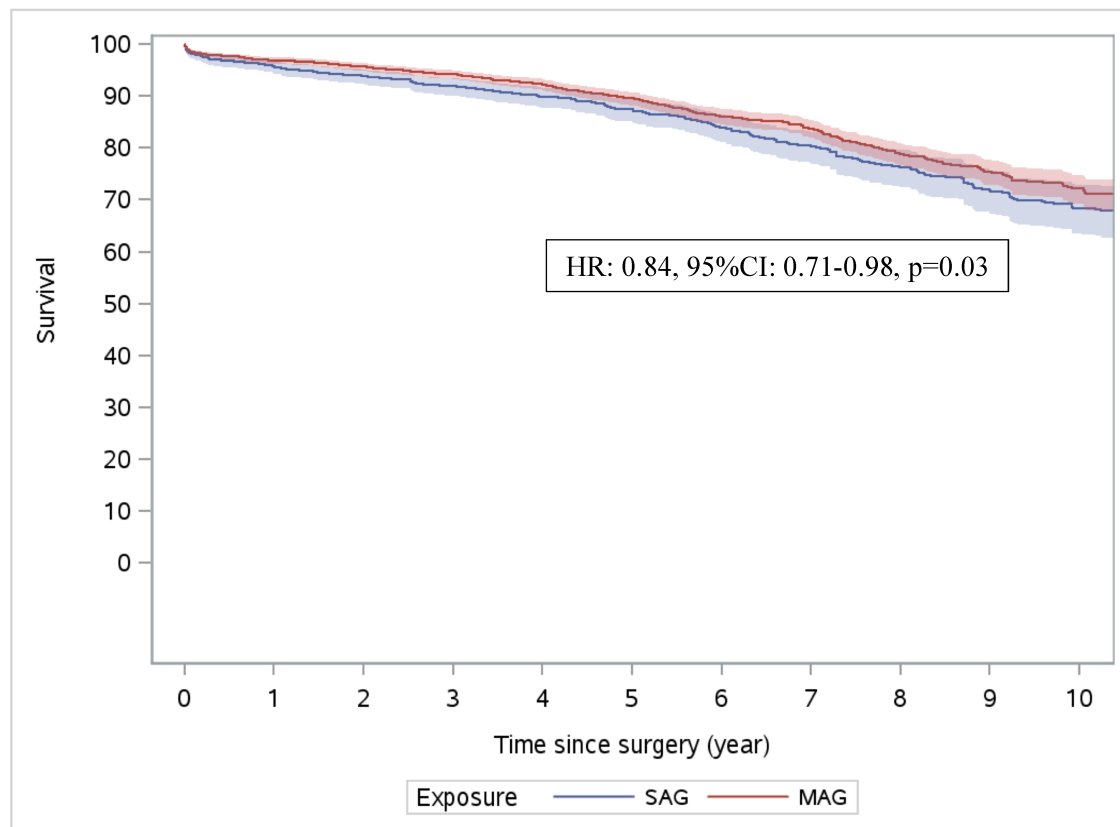

Supplemental Figure 8. Weighted Kaplan-Meier curves for survival. Survival was compared between multiple arterial grafting (MAG) versus single arterial grafting (SAG) after inverse-probability of treatment weighting in patients multivessel coronary artery disease. The shaded region around the curve represents the 95% confidence interval.

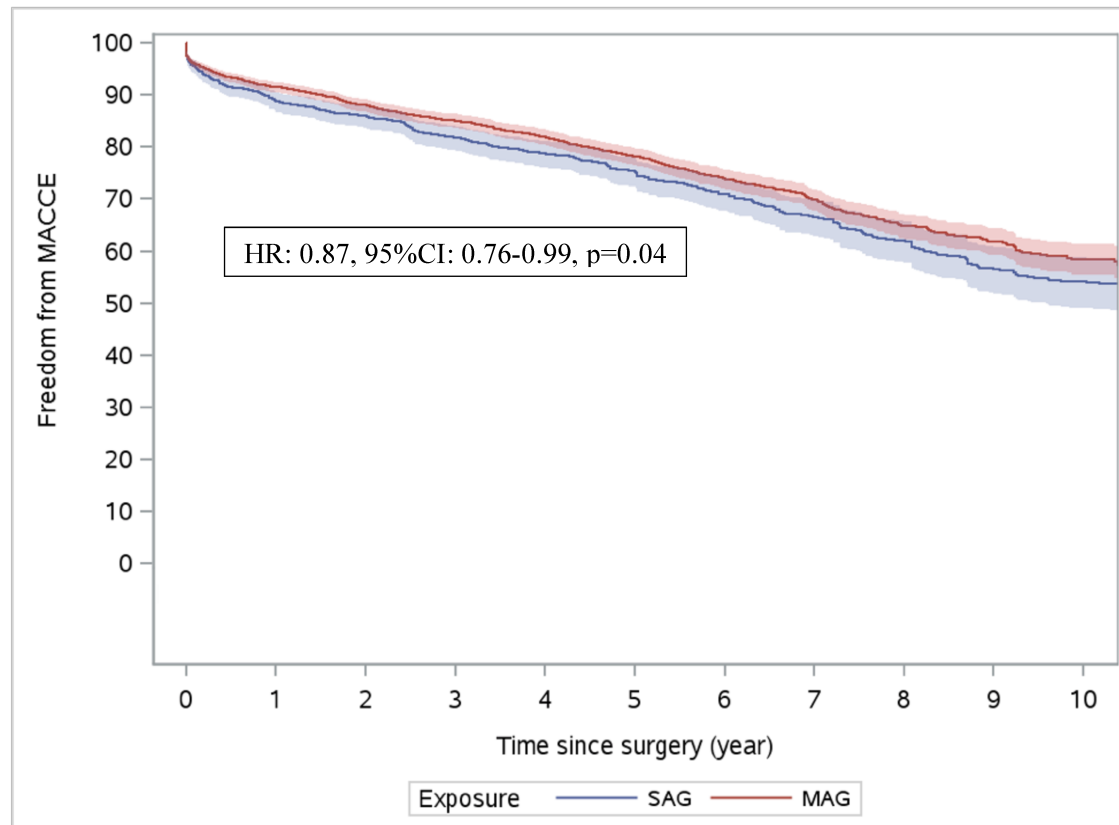

Supplemental Figure 9. Weighted Kaplan-Meier curves for freedom from major adverse cardiac and cerebrovascular events (MACCE). Freedom from MACCE was compared between multiple arterial grafting (MAG) versus single arterial grafting (SAG) after inverse-probability of treatment weighting in patients multivessel coronary artery disease. The shaded region around the curve represents the 95% confidence interval.

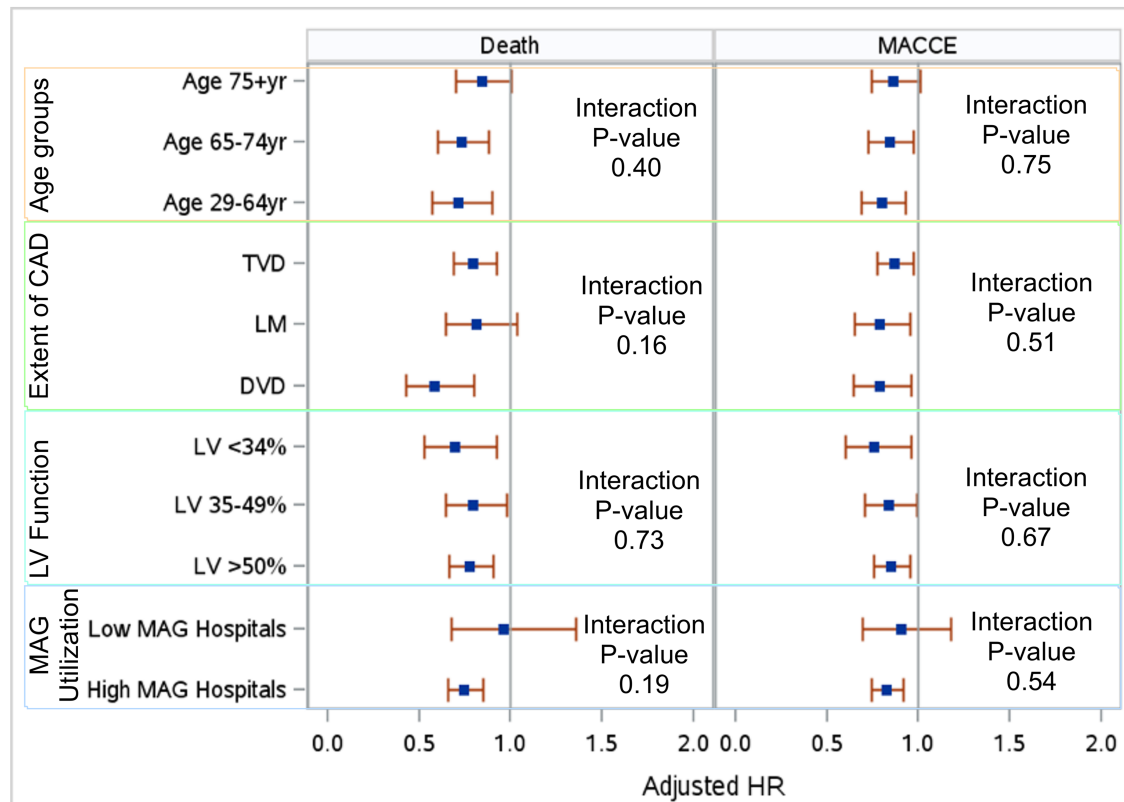

**Supplemental Figure 10.** Subgroup analysis comparing multiple arterial grafting (MAG) versus single arterial grafting (SAG) for the primary outcome of death and the secondary outcome of major adverse cardiac and cerebrovascular events (MACCE) in a multivariable Cox-proportional hazards model. The adjusted hazard ratio (HR) is presented with  $>1.0$  indicating harm with MAG and  $<1.0$  indicating benefit for MAG. CAD, coronary artery disease, LV, left ventricular

## Supplemental Tables

**Supplemental Table 1. Baseline characteristics of propensity score (PS) matched patients and patients that were not matched**

| Variable                    | PS Matched       | Not Matched      | Overall          | SMD  | P-value |
|-----------------------------|------------------|------------------|------------------|------|---------|
|                             | N=4,892          | N=6,023          | N=10,915         |      |         |
| Age                         | 66.7<br>(9.8)    | 69.3<br>(9.1)    | 68.1 (9.6)       | 0.27 | <.0001  |
| Body Mass Index             | 29.4<br>(5.9)    | 29.3<br>(6.1)    | 29.3 (6.0)       | 0    | 0.88    |
| Hospital Frailty Risk Score | 3.3 (4.1)        | 3.9 (4.7)        | 3.6 (4.4)        | 0.15 | <.0001  |
| Income Quintile             |                  |                  |                  |      | <.0001  |
| Lowest 1                    | 1,174<br>(24.0%) | 1,479<br>(24.6%) | 2,653<br>(24.3%) | 0.01 |         |
| 2                           | 1,060<br>(21.7%) | 1,271<br>(21.1%) | 2,331<br>(21.4%) | 0.01 |         |
| 3                           | 958<br>(19.6%)   | 1,262<br>(21.0%) | 2,220<br>(20.3%) | 0.03 |         |
| 4                           | 874<br>(17.9%)   | 1,089<br>(18.1%) | 1,963<br>(18.0%) | 0.01 |         |
| Highest 5                   | 826<br>(16.9%)   | 922<br>(15.3%)   | 1,748<br>(16.0%) | 0.04 |         |
| Hypertension                | 3,929<br>(80.3%) | 5,099<br>(84.7%) | 9,028<br>(82.7%) | 0.11 | <.0001  |
| Diabetes                    | 2,280<br>(46.6%) | 2,905<br>(48.2%) | 5,185<br>(47.5%) | 0.03 | 0.0909  |
| History of smoking          |                  |                  |                  |      | <.0001  |
| Current                     | 1,042<br>(21.3%) | 1,102<br>(18.3%) | 2,144<br>(19.6%) | 0.08 |         |
| Former                      | 1,126<br>(23.0%) | 1,577<br>(26.2%) | 2,703<br>(24.8%) | 0.07 |         |
| Never                       | 2,724<br>(55.7%) | 3,344<br>(55.5%) | 6,068<br>(55.6%) | 0    |         |
| CCS Class                   |                  |                  |                  |      | <.0001  |
| 0                           | 225<br>(4.6%)    | 291<br>(4.8%)    | 516<br>(4.7%)    | 0.01 |         |
| 1                           | 313<br>(6.4%)    | 372<br>(6.2%)    | 685<br>(6.3%)    | 0.01 |         |

|                           |                  |                  |                  |      |        |
|---------------------------|------------------|------------------|------------------|------|--------|
| 2                         | 795<br>(16.3%)   | 887<br>(14.7%)   | 1,682<br>(15.4%) | 0.04 |        |
| 3                         | 981<br>(20.1%)   | 1,066<br>(17.7%) | 2,047<br>(18.8%) | 0.06 |        |
| 4                         | 202<br>(4.1%)    | 328<br>(5.4%)    | 530<br>(4.9%)    | 0.06 |        |
| ACS High Risk             | 186<br>(3.8%)    | 414<br>(6.9%)    | 600<br>(5.5%)    | 0.14 |        |
| ACS Intermediate Risk     | 1,033<br>(21.1%) | 1,162<br>(19.3%) | 2,195<br>(20.1%) | 0.05 |        |
| ACS Low Risk              | 1,157<br>(23.7%) | 1,503<br>(25.0%) | 2,660<br>(24.4%) | 0.03 |        |
| NY Heart Association      |                  |                  |                  |      | <.0001 |
| I                         | 3,725<br>(76.1%) | 3,810<br>(63.3%) | 7,535<br>(69.0%) | 0.28 |        |
| II                        | 63<br>(1.3%)     | 126<br>(2.1%)    | 189<br>(1.7%)    | 0.06 |        |
| III                       | 271<br>(5.5%)    | 379<br>(6.3%)    | 650<br>(6.0%)    | 0.03 |        |
| IV                        | 405<br>(8.3%)    | 521<br>(8.7%)    | 926<br>(8.5%)    | 0.01 |        |
| Unknown                   | 428<br>(8.7%)    | 1,187<br>(19.7%) | 1,615<br>(14.8%) | 0.32 |        |
| Left ventricular function |                  |                  |                  |      | 0.6283 |
| 20% - 34 %                | 379<br>(7.7%)    | 463<br>(7.7%)    | 842<br>(7.7%)    | 0    |        |
| 35% - 49%                 | 1,005<br>(20.5%) | 1,234<br>(20.5%) | 2,239<br>(20.5%) | 0    |        |
| <20%                      | 57<br>(1.2%)     | 55<br>(0.9%)     | 112<br>(1.0%)    | 0.02 |        |
| >=50%                     | 3,451<br>(70.5%) | 4,271<br>(70.9%) | 7,722<br>(70.7%) | 0.01 | <.0001 |
| History of CHF            | 453<br>(9.3%)    | 782<br>(13.0%)   | 1,235<br>(11.3%) | 0.12 | 0.04   |
| History of MI             | 923<br>(18.9%)   | 1,231<br>(20.4%) | 2,154<br>(19.7%) | 0.04 | 0.0012 |
| Recent MI                 | 1,744<br>(35.7%) | 2,329<br>(38.7%) | 4,073<br>(37.3%) | 0.06 | 0.0059 |

|                                   |                  |                  |                  |      |        |
|-----------------------------------|------------------|------------------|------------------|------|--------|
| PVD                               | 529<br>(10.8%)   | 754<br>(12.5%)   | 1,283<br>(11.8%) | 0.05 | 0.0005 |
| CVD                               | 440<br>(9.0%)    | 663<br>(11.0%)   | 1,103<br>(10.1%) | 0.07 | <.0001 |
| COPD                              | 418<br>(8.5%)    | 684<br>(11.4%)   | 1,102<br>(10.1%) | 0.09 | <.0001 |
| Creatinine Group                  |                  |                  |                  |      | <.0001 |
| 0-120                             | 4,523<br>(92.5%) | 5,335<br>(88.6%) | 9,858<br>(90.3%) | 0.13 |        |
| 121-180                           | 282<br>(5.8%)    | 420<br>(7.0%)    | 702<br>(6.4%)    | 0.05 |        |
| >180                              | 87<br>(1.8%)     | 268<br>(4.4%)    | 355<br>(3.3%)    | 0.15 |        |
| Dialysis                          | 45<br>(0.9%)     | 146<br>(2.4%)    | 191<br>(1.7%)    | 0.12 | <.0001 |
| Urgency Status                    |                  |                  |                  |      | <.0001 |
| Elective                          | 2,103<br>(43.0%) | 2,300<br>(38.2%) | 4,403<br>(40.3%) | 0.1  |        |
| SemiUrgent                        | 1,451<br>(29.7%) | 2,011<br>(33.4%) | 3,462<br>(31.7%) | 0.08 |        |
| Urgent                            | 1,338<br>(27.4%) | 1,712<br>(28.4%) | 3,050<br>(27.9%) | 0.02 |        |
| Extent of coronary artery disease |                  |                  |                  |      | 0.11   |
| DVD with proximal LAD             | 696<br>(14.2%)   | 892<br>(14.8%)   | 1,588<br>(14.5%) | 0.02 |        |
| DVD without proximal LAD          | 408<br>(8.3%)    | 459<br>(7.6%)    | 867<br>(7.9%)    | 0.03 |        |
| LM ± SVD/DVD                      | 948<br>(19.4%)   | 1,437<br>(23.9%) | 2,385<br>(21.9%) | 0.11 |        |
| LM with TVD                       | 578<br>(11.8%)   | 698<br>(11.6%)   | 1,276<br>(11.7%) | 0.01 |        |
| TVD without LM                    | 2,262<br>(46.2%) | 2,537<br>(42.1%) | 4,799<br>(44.0%) | 0.08 |        |
| Off Pump                          | 1,391<br>(28.4%) | 692<br>(11.5%)   | 2,083<br>(19.1%) | 0.43 | <.0001 |

ACS, acute coronary syndrome, CCS, Canadian Cardiovascular Society, CHF, congestive heart failure, COPD, chronic obstructive pulmonary disorder, CVD, cerebrovascular disease, DVD, double vessel disease, LAD, left anterior descending artery, LM, left main, MI, myocardial

infarction, PVD, peripheral vascular disease, SVD, single vessel disease, TVD, triple vessel disease



**Supplemental Table 2.** Long-term outcomes before and after propensity score matching

|                             | Year    | MAG                            | SAG                        |
|-----------------------------|---------|--------------------------------|----------------------------|
| Survival                    | 1       | 96.9% (95%CI: 96.2%-97.4%)     | 94.5% (95%CI: 94%-95%)     |
|                             | 5       | 89.5% (95%CI: 88.2%-90.7%)     | 82.8% (95%CI: 81.8%-83.7%) |
|                             | 10      | 72.1% (95%CI: 69.2%-74.8%)     | 62.5% (95%CI: 60.6%-64.4%) |
|                             | Overall | HR: 0.65, 95%CI: (0.59 - 0.73) |                            |
| Freedom from<br>MACCE       | 1       | 91.4% (95%CI: 90.4%-92.4%)     | 87.9% (95%CI: 87.2%-88.6%) |
|                             | 5       | 78.2% (95%CI: 76.4%-79.8%)     | 70.2% (95%CI: 69.1%-71.3%) |
|                             | 10      | 58.4% (95%CI: 55.5%-61.3%)     | 48.5% (95%CI: 46.7%-50.4%) |
|                             | Overall | HR: 0.73, 95%CI: (0.67 - 0.79) |                            |
| Acute MI                    | 1       | 2.3% (95%CI: 1.8%-2.8%)        | 3.1% (95%CI: 2.8%-3.5%)    |
|                             | 5       | 6% (95%CI: 5.1%-7%)            | 8.2% (95%CI: 7.5%-8.9%)    |
|                             | 10      | 12.6% (95%CI: 10.7%-14.8%)     | 17% (95%CI: 15.5%-18.6%)   |
|                             | Overall | HR: 0.74, 95%CI: (0.63 - 0.87) |                            |
| Repeat<br>Revascularization | 1       | 2.4% (95%CI: 1.9%-3%)          | 2.9% (95%CI: 2.6%-3.3%)    |
|                             | 5       | 7.1% (95%CI: 6.1%-8.2%)        | 8% (95%CI: 7.3%-8.7%)      |
|                             | 10      | 11.5% (95%CI: 9.9%-13.3%)      | 13.6% (95%CI: 12.3%-14.9%) |
|                             | Overall | HR: 0.92, 95%CI: (0.79 - 1.07) |                            |
| Stroke                      | 1       | 0.7% (95%CI: 0.4%-1%)          | 0.8% (95%CI: 0.6%-1%)      |
|                             | 5       | 3.2% (95%CI: 2.5%-4%)          | 3.9% (95%CI: 3.4%-4.4%)    |
|                             | 10      | 6.5% (95%CI: 5.1%-8.3%)        | 8.4% (95%CI: 7.3%-9.6%)    |
|                             | Overall | HR: 0.79, 95%CI: (0.63 - 0.99) |                            |

MACCE, major cardiac and cerebrovascular events (composite of time to first event for death, acute MI, repeat revascularization, or stroke). MAG, multiple arterial grafting, MI, myocardial infarction, SAG, single arterial grafting

For survival and freedom from MACCE, Kaplan-Meier estimates are shown. For Acute MI, repeat revascularization, and stroke, the cumulative incidence estimate are shown.

**Supplemental Table 3.** Long-term outcomes after propensity score matching

|                             | Year    | MAG                            | SAG                            |
|-----------------------------|---------|--------------------------------|--------------------------------|
| Survival                    | 1       | 96.6% (95%CI: 95.8%-<br>97.3%) | 95.5% (95%CI: 94.6%-<br>96.3%) |
|                             | 5       | 88.8% (95%CI: 87.3%-<br>90.2%) | 86.2% (95%CI: 84.6%-<br>87.7%) |
|                             | 10      | 70.7% (95%CI: 67.5%-<br>73.7%) | 67.3% (95%CI: 64%-70.4%)       |
|                             | Overall | HR: 0.85, 95%CI: (0.75 - 0.98) |                                |
| Freedom from<br>MACCE       | 1       | 90.8% (95%CI: 89.6%-<br>91.9%) | 88.8% (95%CI: 87.5%-90%)       |
|                             | 5       | 77.2% (95%CI: 75.2%-79%)       | 73.1% (95%CI: 71.1%-75%)       |
|                             | 10      | 57% (95%CI: 53.8%-60.1%)       | 50.6% (95%CI: 47.3%-<br>53.8%) |
|                             | Overall | HR: 0.85, 95%CI: (0.76 - 0.93) |                                |
| Acute MI                    | 1       | 2.5% (95%CI: 2%-3.2%)          | 3.6% (95%CI: 2.9%-4.4%)        |
|                             | 5       | 7.2% (95%CI: 6.1%-8.4%)        | 9.2% (95%CI: 7.9%-10.6%)       |
|                             | 10      | 11.3% (95%CI: 9.6%-13.2%)      | 16.3% (95%CI: 13.9%-19%)       |
|                             | Overall | HR: 0.82, 95%CI: (0.67 – 1.00) |                                |
| Repeat<br>Revascularization | 1       | 2.4% (95%CI: 1.8%-3%)          | 2.8% (95%CI: 2.2%-3.6%)        |
|                             | 5       | 6.1% (95%CI: 5.1%-7.2%)        | 7.5% (95%CI: 6.3%-8.7%)        |
|                             | 10      | 13.3% (95%CI: 11.2%-<br>15.7%) | 16.2% (95%CI: 13.8%-<br>18.9%) |
|                             | Overall | HR: 0.79, 95%CI: (0.65 - 0.94) |                                |
| Stroke                      | 1       | 0.7% (95%CI: 0.4%-1.1%)        | 0.6% (95%CI: 0.4%-1%)          |
|                             | 5       | 3.4% (95%CI: 2.6%-4.3%)        | 3.4% (95%CI: 2.6%-4.3%)        |
|                             | 10      | 6.7% (95%CI: 5.1%-8.6%)        | 6.9% (95%CI: 5.3%-8.9%)        |

|  |         |                                |
|--|---------|--------------------------------|
|  | Overall | HR: 1.03, 95%CI: (0.76 - 1.38) |
|--|---------|--------------------------------|

MACCE, major cardiac and cerebrovascular events (composite of time to first event for death, acute MI, repeat revascularization, or stroke). MAG, multiple arterial grafting, MI, myocardial infarction, SAG, single arterial grafting

For survival and freedom from MACCE, Kaplan-Meier estimates are shown. For Acute MI, repeat revascularization, and stroke, the cumulative incidence estimate are shown.

**Supplemental Table 4.** Baseline characteristics before and after inverse probability of treatment weighting (IPTW)

| Variable                    | Before IPTW |       |       | After IPTW |       |       |
|-----------------------------|-------------|-------|-------|------------|-------|-------|
|                             | MAG         | SAG   | SMD   | MAG        | SAG   | SMD   |
| Age                         | 66.0        | 68.9  | 0.30  | 66.0       | 65.5  | 0.050 |
| Body Mass Index             | 29.2        | 29.4  | 0.020 | 29.2       | 29.3  | 0.010 |
| Hospital Frailty Risk Score | 3.2         | 3.8   | 0.150 | 3.2        | 3.3   | 0.030 |
| Income Quintile             |             |       |       |            |       |       |
| Lowest 1                    | 22.5%       | 25.0% | 0.060 | 22.5%      | 24.0% | 0.030 |
| 2                           | 21.1%       | 21.4% | 0.010 | 21.1%      | 21.1% |       |
| 3                           | 20.5%       | 20.3% | 0.010 | 20.5%      | 20.7% | 0.000 |
| 4                           | 18.5%       | 17.8% | 0.020 | 18.5%      | 17.8% | 0.020 |
| Highest 5                   | 17.3%       | 15.5% | 0.050 | 17.3%      | 16.5% | 0.020 |
| Hypertension                | 79.2%       | 84.0% | 0.12  | 79.2%      | 78.2% | 0.020 |
| Diabetes                    | 46.4%       | 47.9% | 0.030 | 46.4%      | 47.3% | 0.020 |
| History of smoking          |             |       |       |            |       |       |
| Current                     | 20.2%       | 19.4% | 0.020 | 20.2%      | 20.4% | 0.000 |
| Former                      | 22.1%       | 25.8% | 0.090 | 22.1%      | 23.7% | 0.040 |
| Never                       | 57.8%       | 54.8% | 0.060 | 57.8%      | 55.9% | 0.040 |
| CCS Class                   |             |       |       |            |       |       |
| 0                           | 5.0%        | 4.6%  | 0.020 | 5.0%       | 5.4%  | 0.020 |
| 1                           | 5.8%        | 6.4%  | 0.020 | 5.8%       | 6.3%  | 0.020 |
| 2                           | 17.0%       | 14.8% | 0.060 | 17.0%      | 17.5% | 0.010 |
| 3                           | 20.1%       | 18.3% | 0.050 | 20.1%      | 21.2% | 0.030 |
| 4                           | 3.8%        | 5.3%  | 0.070 | 3.8%       | 3.5%  | 0.010 |
| ACS High Risk               | 3.3%        | 6.3%  | 0.14  | 3.3%       | 3.8%  | 0.020 |

|                           |       |       |       |       |       |            |
|---------------------------|-------|-------|-------|-------|-------|------------|
| ACS Intermediate Risk     | 21.1% | 19.7% | 0.040 | 21.1% | 18.5% | 0.070      |
| ACS Low Risk              | 23.8% | 24.6% | 0.020 | 23.8% | 23.9% | 0.001<br>0 |
| NY Heart Association      |       |       |       |       |       |            |
| I                         | 79.3% | 65.2% | 0.32  | 79.3% | 77.9% | 0.030      |
| II                        | 1.1%  | 2.0%  | 0.070 | 1.1%  | 1.0%  | 0.010      |
| III                       | 4.9%  | 6.3%  | 0.060 | 4.9%  | 5.8%  | 0.040      |
| IV                        | 7.1%  | 9.0%  | 0.070 | 7.1%  | 7.8%  | 0.030      |
| Unknown                   | 7.6%  | 17.5% | 0.30  | 7.6%  | 7.5%  | 0.000      |
| Left ventricular function |       |       |       |       |       |            |
| 20% - 34 %                | 7.5%  | 7.8%  | 0.010 | 7.5%  | 8.5%  | 0.040      |
| 35% - 49%                 | 20.4% | 20.5% |       | 20.4% | 19.8% | 0.020      |
| <20%                      | 1.3%  | 0.9%  | 0.040 | 1.3%  | 1.3%  | 0.000      |
| >=50%                     | 70.8% | 70.7% |       | 70.8% | 70.4% | 0.010      |
| History of CHF            | 8.3%  | 12.4% | 0.14  | 8.3%  | 9.2%  | 0.030      |
| History of MI             | 17.7% | 20.5% | 0.070 | 17.7% | 17.9% | 0.010      |
| Recent MI                 | 35.0% | 38.2% | 0.070 | 35.0% | 33.2% | 0.040      |
| PVD                       | 10.1% | 12.4% | 0.070 | 10.1% | 11.2% | 0.030      |
| CVD                       | 9.0%  | 10.5% | 0.050 | 9.0%  | 8.6%  | 0.010      |
| COPD                      | 8.0%  | 10.9% | 0.10  | 8.0%  | 8.2%  | 0.010      |
| Creatinine Group          |       |       |       |       |       | 0.000      |
| 0-120                     | 93.0% | 89.3% | 0.13  | 93.0% | 92.9% | 0.010      |
| 121-180                   | 5.6%  | 6.7%  | 0.050 | 5.6%  | 5.5%  | 0.000      |
| >180                      | 1.4%  | 4.0%  | 0.16  | 1.4%  | 1.6%  | 0.020      |
| Dialysis                  | 0.7%  | 2.1%  | 0.12  | 0.7%  | 0.8%  | 0.000      |
| Urgency Status            |       |       |       |       |       |            |

|                                   |       |       |       |       |       |       |
|-----------------------------------|-------|-------|-------|-------|-------|-------|
| Elective                          | 45.2% | 38.5% | 0.14  | 45.2% | 47.0% | 0.040 |
| SemiUrgent                        | 28.5% | 32.9% | 0.090 | 28.5% | 28.3% | 0.010 |
| Urgent                            | 26.3% | 28.6% | 0.050 | 26.3% | 24.7% | 0.040 |
| Extent of coronary artery disease |       |       |       |       |       |       |
| DVD with proximal LAD             | 13.8% | 14.8% | 0.030 | 13.8% | 13.2% | 0.020 |
| DVD without proximal LAD          | 8.6%  | 7.7%  | 0.030 | 8.6%  | 8.8%  | 0.010 |
| LM ± SVD/DVD                      | 16.9% | 23.7% | 0.17  | 16.9% | 18.2% | 0.030 |
| LM with TVD                       | 11.2% | 11.9% | 0.020 | 11.2% | 10.6% | 0.020 |
| TVD without LM                    | 49.5% | 41.9% | 0.15  | 49.5% | 49.2% | 0.010 |
| Off Pump                          | 40.2% | 11.2% | 0.70  | 40.2% | 37.8% | 0.050 |

ACS, acute coronary syndrome, CCS, Canadian Cardiovascular Society, CHF, congestive heart failure, COPD, chronic obstructive pulmonary disorder, CVD, cerebrovascular disease, DVD, double vessel disease, LAD, left anterior descending artery, LM, left main, MI, myocardial infarction, PVD, peripheral vascular disease, SVD, single vessel disease, TVD, triple vessel disease
